# Supplementary material for: Electrochemical amination of graphene using nanosized PAMAM dendrimers for sensing applications
Source: Royal Society of Chemistry journal article supplement (doi:10.1039/c5ra27862g), 2016-01-01
Supplement: c5ra27862g1.pdf [file c5ra27862g1.pdf]

## Electronic supplementary information of

### Electrochemical amination of graphene using nanosized PAMAM dendrimers for sensing applications

Chiranjeevi Srinivasa Rao Vusa<sup>#</sup>, Venkatesan Manju<sup>#</sup>, Sheela Berchmans<sup>\*</sup>, Palaniappan Arumugam<sup>\*</sup>

Electrodeics and Electrocatalysis Division, CSIR-Central Electrochemical Research Institute, Karaikudi, Tamilnadu-630006, India.

#### Electrochemical surface area of GCE and graphene modified GCE

Randles-Sevcik equation was used to calculate electrochemical surface area of GCE and graphene modified GCE

$$i_p = 2.69 \times 10^5 AC D^{1/2} \nu^{1/2} n^{3/2} \dots\dots\dots (S1)$$

Where  $i_p$ =oxidation peak current of  $K_4[Fe(CN)_6]$  in ampere obtained from cyclic voltammogram of 5 mM  $K_4[Fe(CN)_6]$  in 0.5 M KCl at the scan rate of  $50 \text{ mVs}^{-1}$ , A=electrochemical surface area of electrode in  $\text{cm}^2$ , C= Concentration of analyte (5 mM  $K_4[Fe(CN)_6]$  in 0.5 M KCl) in  $\text{mol cm}^{-3}$ , D- Diffusion coefficient of  $K_4[Fe(CN)_6]$  known as  $6.5 \times 10^{-6} \text{ cm}^2 \text{ s}^{-1}$ ,  $\nu$  scan rate in  $\text{V s}^{-1}$  and n- number of electron transferred in the redox reaction (usually 1).

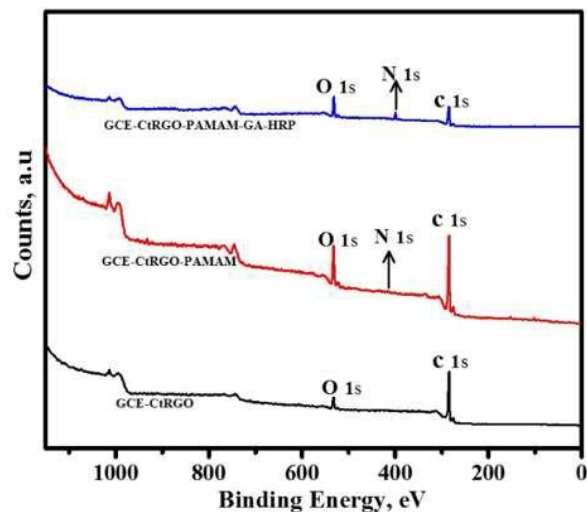

**Figure S1.** The wide scan of X-ray photoelectron spectra of graphene, aminated graphene and HRP immobilized aminated graphene surface.

**Table s1.** The XPS data analysis of C1s, O1s and N1s of electrode surfaces

| Electrode Surface   | C1s, BE (eV)                                        | O1s, BE (eV)                                                            | N1s, BE (eV)                                                                                   |
|---------------------|-----------------------------------------------------|-------------------------------------------------------------------------|------------------------------------------------------------------------------------------------|
| GCE-CtRGO           | 284.9, (C-C)<br>285.9, (C-O)<br>289.4, (C(O)OH)     | 531.3, (R-(C=O)-R)<br>532.7, (C-OH, C-O-C)<br>533.6, (O=C-OH, O=C-OR)   | No peak                                                                                        |
| GCE-CtRGO-PAMAM     | 284.9, (C-C)<br>285.9, (C-O/C-N)<br>289.4, (C(O)OH) | 531.7, (R-(C=O)-R)<br>532.6, (C-OH, C-O-C)<br>533.7, (O=C-OH, O=C-OR)   | 399.07, (N-C, sp <sup>3</sup> )<br>400.3, (N-C, sp <sup>2</sup> )<br>401.2, (protonated amine) |
| GCE-CtRGO-PAMAM-HRP | 284.9, (C-C)<br>286.2, (C-O/C-N)<br>287.9, (C(O)OH) | 531.48, (R-(C=O)-R)<br>532.47, (C-OH, C-O-C)<br>533.6, (O=C-OH, O=C-OR) | 399.7, (N-C, sp <sup>3</sup> )<br>400.4, (N-C, sp <sup>2</sup> )<br>401.7, (protonated amine)  |

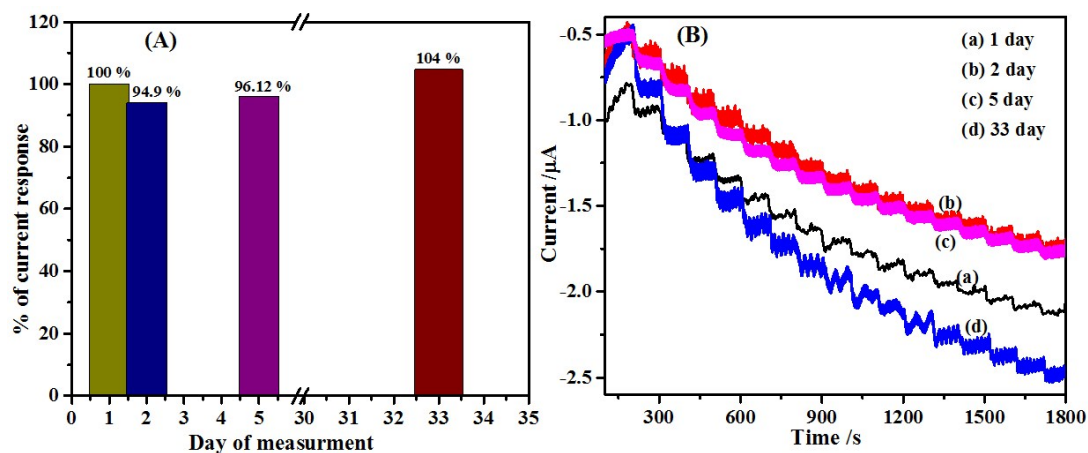

**Figure S2.** The current response of GCE-CtRGO-PAMAM-GA-HRP for 100  $\mu\text{M}$   $\text{H}_2\text{O}_2$  from chronoamperograms at different time intervals (A) and the corresponding chronoamperograms (B).

**Table S2.** Determination of  $\text{H}_2\text{O}_2$  in Human Serum

| Sample                                     | Added ( $\mu\text{M}$ ) | Found ( $\mu\text{M}$ ) | Recovery % |
|--------------------------------------------|-------------------------|-------------------------|------------|
| Serum                                      | -                       | -                       | -          |
| $\text{H}_2\text{O}_2$ spiked Serum Sample | 50                      | 46                      | 91         |
|                                            | 50                      | 49.5                    | 99         |
|                                            | 50                      | 45.2                    | 90.4       |
| Standard $\text{H}_2\text{O}_2$ sample     | 50                      | 52.3                    | 104.6      |
|                                            | 50                      | 50.2                    | 100.4      |

Mean recovery 96.28 %
